# Supplementary material for: Mediating role of frailty/pre-frailty on the association between exercise participation and traffic crashes among Japanese community-dwelling older drivers
Source: Research Square preprint supplement (doi:10.21203/rs.3.rs-5143153/v1), 2025-04-02
Supplement: Supplementary file 1 [file 3746d81d07cdaa9dc8f800b1.docx]

**Supplementary material**

**Table 1** English translation of the Kihon Checklist

| **No.** | **Questions** |  | | **Answer** | |
| --- | --- | --- | --- | --- | --- |
| 1  2  3  4  5  6  7  8  9  10  11  12  13  14  15  16  17  18  19  20  21  22  23  24  25 | Do you go out by bus or train by yourself?  Do you go shopping to buy daily necessities by yourself?  Do you manage your own deposits and savings at the bank?  Do you sometimes visit your friends?  Do you turn to your family or friends for advice?  Do you normally climb stairs without using handrail or wall for support?  Do you normally stand up from a chair without any aids?  Do you normally walk continuously for 15 minutes?  Have you experienced a fall in the past year?  Do you have a fear of falling while walking?  Have you lost 2 kg or more in the past 6 months?  Height: cm, weight: kg, BMI: kg/m2 If BMI is less than 18.5, this item is scored.  Do you have any difficulties eating tough foods compared to 6 months ago?  Have you choked on your tea or soup recently?  Do you often experience having a dry mouth?  Do you go out at least once a week?  Do you go out less frequently compared to last year?  Do your family or your friends point out your memory loss? e.g. “You ask the same question over and over again.” Do you make a call by looking up phone numbers?  Do you find yourself not knowing today’s date?  In the last 2 weeks have you felt a lack of fulfilment in your daily life?  In the last 2 weeks have you felt a lack of joy when doing the things you used to enjoy?  In the last 2 weeks have you felt difficulty in doing what you could do easily before?  In the last 2 weeks have you felt helpless?  In the last 2 weeks have you felt tired without a reason? | | □0.YES  □0.YES  □0.YES  □0.YES  □0.YES  □0.YES  □0.YES  □0.YES  □1.YES  □1.YES  □1.YES  □1.YES  □1.YES  □1.YES  □1.YES  □0.YES  □1.YES  □1.YES  □0.YES  □1.YES  □1.YES  □1.YES  □1.YES  □1.YES  □1.YES | | □1.NO  □1.NO  □1.NO  □1.NO  □1.NO  □1.NO  □1.NO  □1.NO  □0.NO  □0.NO  □0.NO  □0.NO  □0.NO  □0.NO  □0.NO  □1.NO  □0.NO  □0.NO  □1.NO  □0.NO  □0.NO  □0.NO  □0.NO  □0.NO  □0.NO | |

Working Group on Frailty in Japanese Geriatrics Society. BMI, body mass index.

**Reference:**

Arai H, Satake S. 2015. English translation of the Kihon Checklist. Geriatr Gerontol Int. 15(4):518-519.

**Table 2** Association between exercise participation and KCL domain (n = 1504)

| KCL domain |  | | Crude model |  |  | Adjusted model | |  |
| --- | --- | --- | --- | --- | --- | --- | --- | --- |
|  | | OR | 95% CI | *p* | OR | | 95% CI | *p* |
| IADL | 0.882 | | 0.464–1.678 | .702 | 1.017 | | 0.519–1.992 | .961 |
| Nutrition  Oral  Socialization  Memory  Mood  Physical | 0.621  0.731  0.305  0.803  0.532  0.339 | | 0.113–3.406  0.537–0.996  0.126–0.739  0.619–1.041  0.389–0.729  0.233–0.493 | .583  .047  .009  .098  < .001  < .001 | 0.561  0.770  0.393  0.823  0.588  0.321 | | 0.096–3.291  0.557–1.065  0.156–0.991  0.629–1.077  0.423–0.819  0.216–0.478 | .522  .114  .048  .155  .002  < .001 |

Adjusted model was adjusted for age, sex, years of education, economic status, living alone, smoking, alcohol consumption and clinical history of hip pain.

Abbreviation: KCL: Kihon Checklist; IADL: instrumental activities of daily living; OR: odds ratios; CI: confidence intervals

**Table 3** Association between KCL domain and traffic crash involvement at follow-up (n = 1504)

| KCL domain |  | | Crude model |  |  | Adjusted model | |  |
| --- | --- | --- | --- | --- | --- | --- | --- | --- |
| Socialization  Mood  Physical | | OR  2.604  1.325  2.297 | 95% CI  0.753–9.004  0.757–2.319  1.279–4.127 | *p*  .131  .324  .005 | OR  2.952  1.187  2.245 | | 95% CI  0.818–10.650  0.659–2.138  1.204–4.187 | *p*  .098  1.187  .011 |

Adjusted model was adjusted for age, sex, years of education, economic status, living alone, smoking, alcohol consumption, clinical history of hip pain, history of traffic crash involvement and history of near-miss traffic incidents at baseline.

Abbreviation: KCL: Kihon Checklist; IADL: instrumental activities of daily living; OR: odds ratios; CI: confidence intervals

**Table 4** Logistic regression between exercise participation, memory domain and traffic crash involvement at follow-up (n = 1504)

|  |  | Exercise participation →  Memory domain† |  |  | Memory domain →  Traffic crash involvement at follow-up‡ | |  |
| --- | --- | --- | --- | --- | --- | --- | --- |
|  | OR | 95% CI | *p* | OR | | 95% CI | *p* |
| Crude model | 0.803 | 0.619–1.041 | .098 | 1.431 | | 0.918–2.230 | .113 |
| Adjusted model | 0.823 | 0.629–1.077 | .155 | 1.289 | | 0.814–2.040 | .279 |

† Adjusted for age, sex, years of education, economic status, living alone, smoking, alcohol consumption and clinical history of hip pain.

‡ Adjusted for age, sex, years of education, economic status, living alone, smoking, alcohol consumption, clinical history of hip pain, history of traffic crash involvement and history of near-miss traffic incidents at baseline.

Abbreviation: OR: odds ratios; CI: confidence intervals

**Table 5** Participants’ characteristics of memory domain (%)

|  | Total | | | Age |  | Sex |  |
| --- | --- | --- | --- | --- | --- | --- | --- |
|  |  |
|  | n = 1517 | | | 65–74 yr | ≥ 75 yr | Male | Female |
| (100%) | | | n = 1150 | n = 367 | n = 889 | n = 628 |
|  | | | (75.8%) | (24.2%) | (58.6%) | (41.4%) |
| Memory domain | |  |  |  |  |  |  |
| Q18: Do your family or your friends point out your memory loss? e.g. “You ask the same question over and over again.” ＿Yes | | 6.6 |  | 6.7 | 6.3 | 7.8 | 4.9 |
| Q19: Do you make a call by looking up phone numbers? ＿No | | 8.1 |  | 9.4 | 4.1 | 9.0 | 6.8 |
| Q20: Do you find yourself not knowing today’s date? ＿Yes | | 17.3 |  | 16.3 | 20.4 | 17.9 | 16.4 |
| Cognitive impairment (Q18–20; cut-off ≥ 1) | | 27.3 |  | 27.6 | 26.4 | 29.0 | 24.8 |
